# Supplementary material
Source: Springer Nature journal article supplement (https://www.springermedizin.de/resource/supplementary/12985_2010_1090_MOESM1_ESM.pdf/9609118)

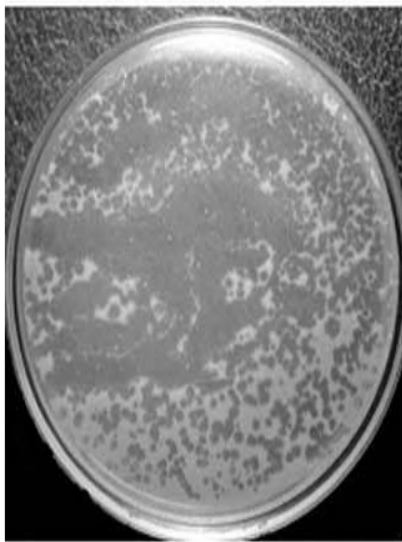

**A**

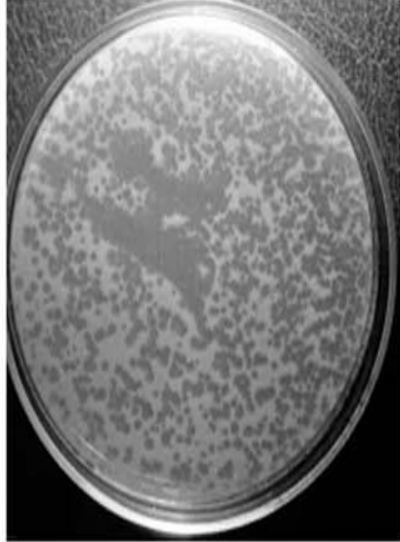

**B**

Supplement: MOESM1 [file 9609118]
